# Supplementary material for: Collagen gel fibrillar density dictates the extent of mineralization in vitro
Source: Royal Society of Chemistry journal article supplement (doi:10.1039/c1sm06027a), 2011-01-01
Supplement: c1sm06027a.pdf [file c1sm06027a.pdf]

### Supplementary Information

Figure S1

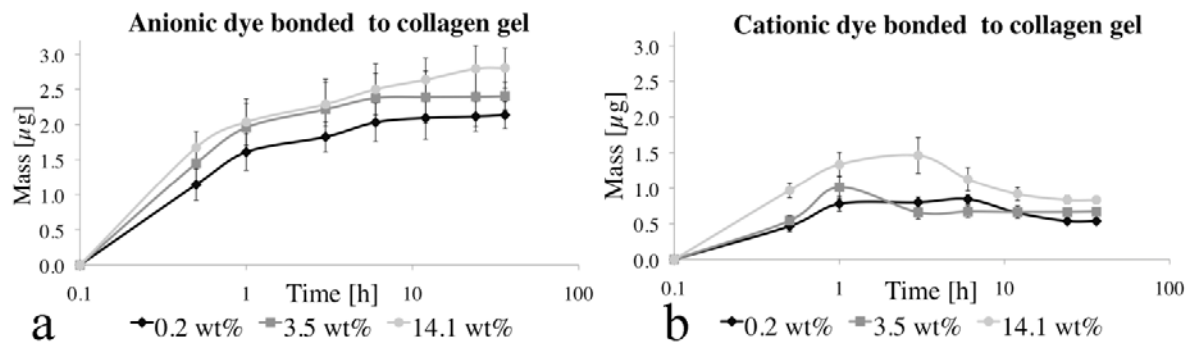

**Figure S1: Ionic dye binding assay.** a) and b) Scatter plots of the anionic and cationic dyes, respectively, bonded to collagen gels with different CFDs.
